# Supplementary material for: A new redox phloroglucinol additive incorporated gel polymer electrolyte for flexible symmetrical solid-state supercapacitors
Source: Royal Society of Chemistry journal article supplement (doi:10.1039/c9se00011a), 2019-01-01
Supplement: c9se00011a1.pdf [file c9se00011a1.pdf]

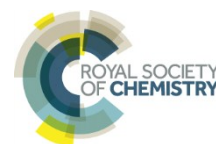

PAPER

**A new redox phloroglucinol additive incorporated gel polymer electrolyte for flexible symmetrical solid-state supercapacitor**

**Phuoc-Anh Le<sup>a</sup>, Van-Truong Nguyen<sup>a</sup>, Po-Jen Yen<sup>a</sup>, Tseung-Yuen Tseng<sup>b\*</sup>, Kung-Hwa Wei<sup>ac\*</sup>**

<sup>a</sup> Department of Materials Science and Engineering, National Chiao Tung University, 1001 Ta-Hsueh Rd., Hsinchu 300, Taiwan.

<sup>b</sup> Department of Electronics Engineering and Institute of Electronics, 1001 Ta-Hsueh Rd., National Chiao Tung University, Hsinchu 300, Taiwan.

<sup>c</sup> Center for Emergent Functional Matter Science, National Chiao Tung University, 1001 Ta-Hsueh Rd., Hsinchu 30010, Taiwan.

Corresponding author: Kung Hwa Wei. Phone: + 886-3-5731871

E-mail: [khwei@mail.nctu.edu.tw](mailto:khwei@mail.nctu.edu.tw)

Tseung Yuen Tseng. Phone: + 886-3-5731879

E-mail: [tseng@cc.nctu.edu.tw](mailto:tseng@cc.nctu.edu.tw)

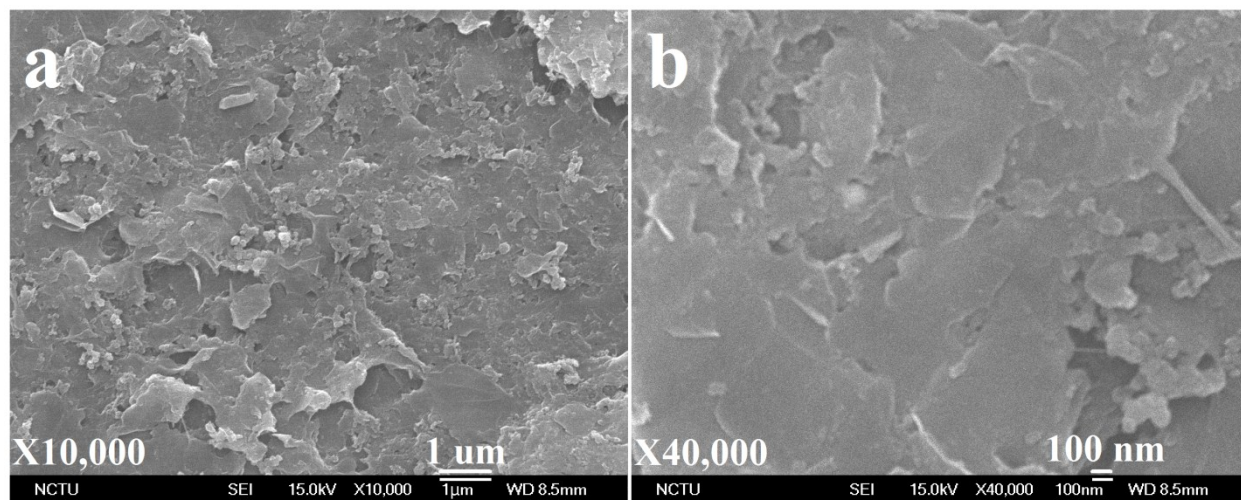

Figure S1 SEM images of nitrogen-doped graphene nanosheets electrodes before electrochemical characterization at various magnifications.

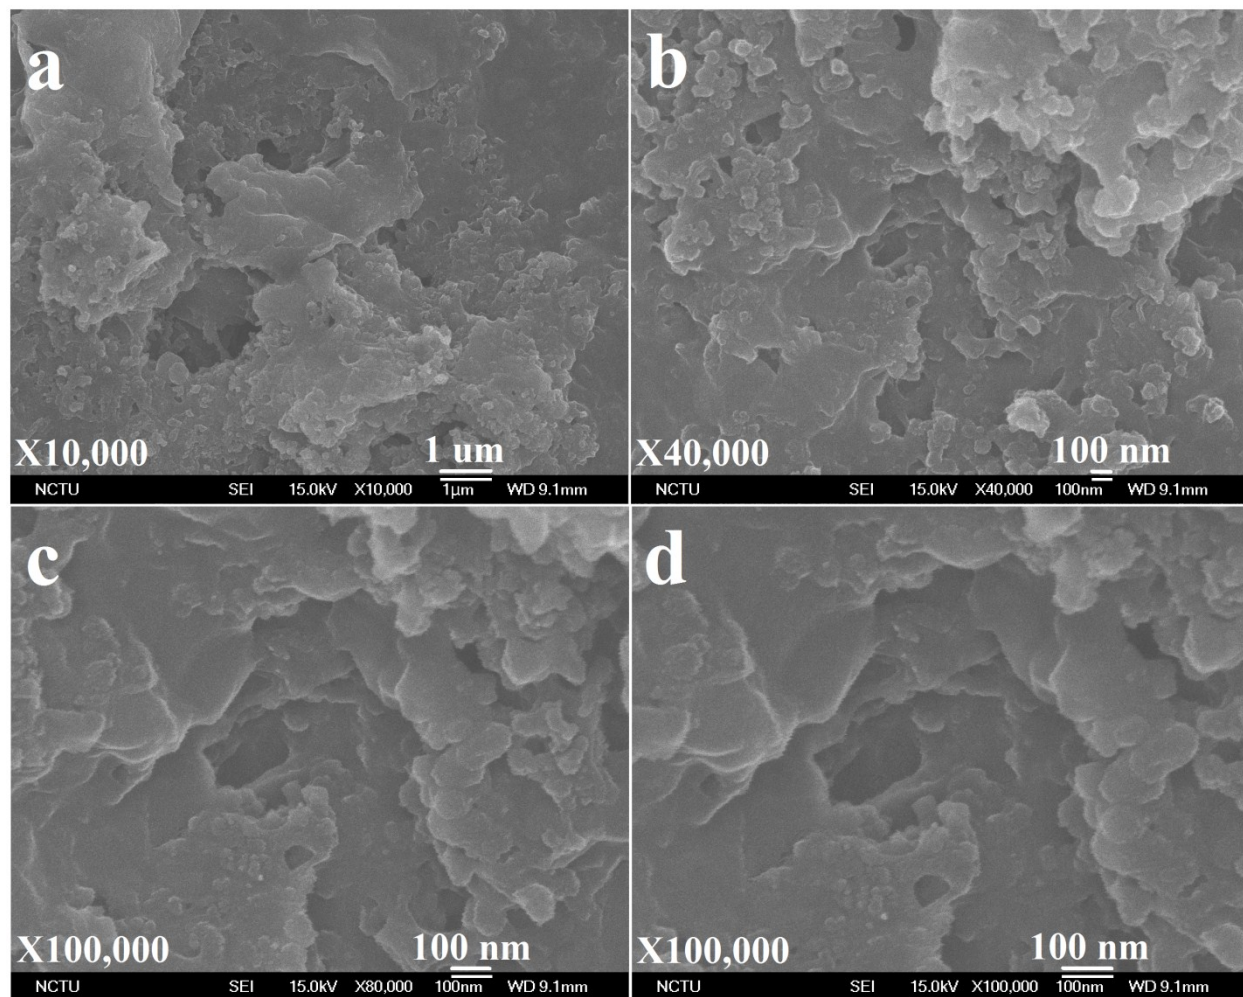

Figure S2 SEM images of nitrogen-doped graphene nanosheets electrodes after electrochemical characterization at various magnifications.

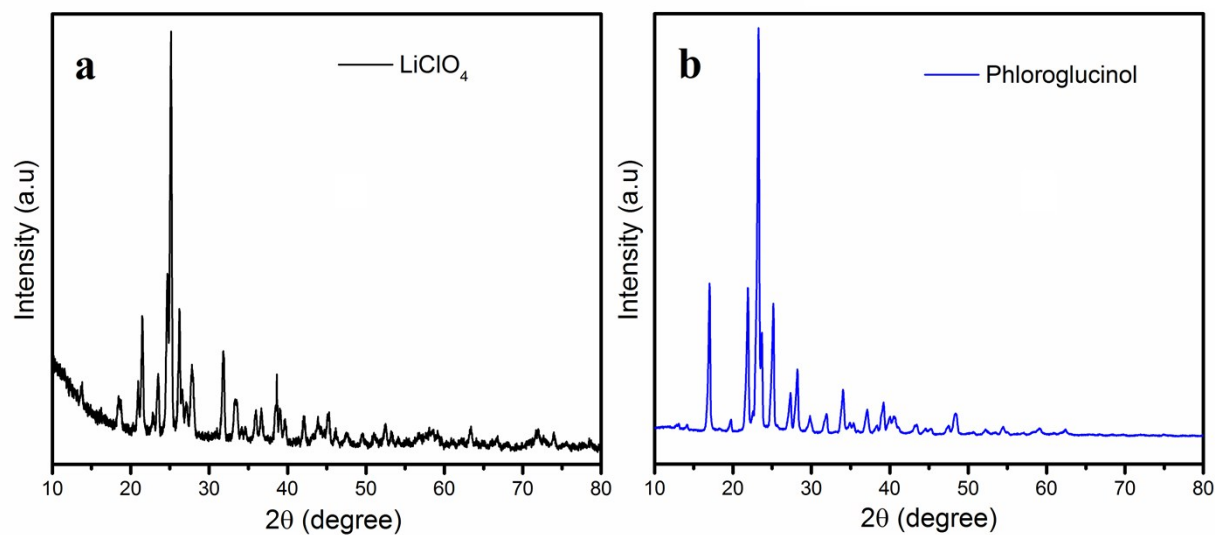

Figure S3 XRD patterns of (a) commercial  $\text{LiClO}_4$  and (b) phloroglucinol.

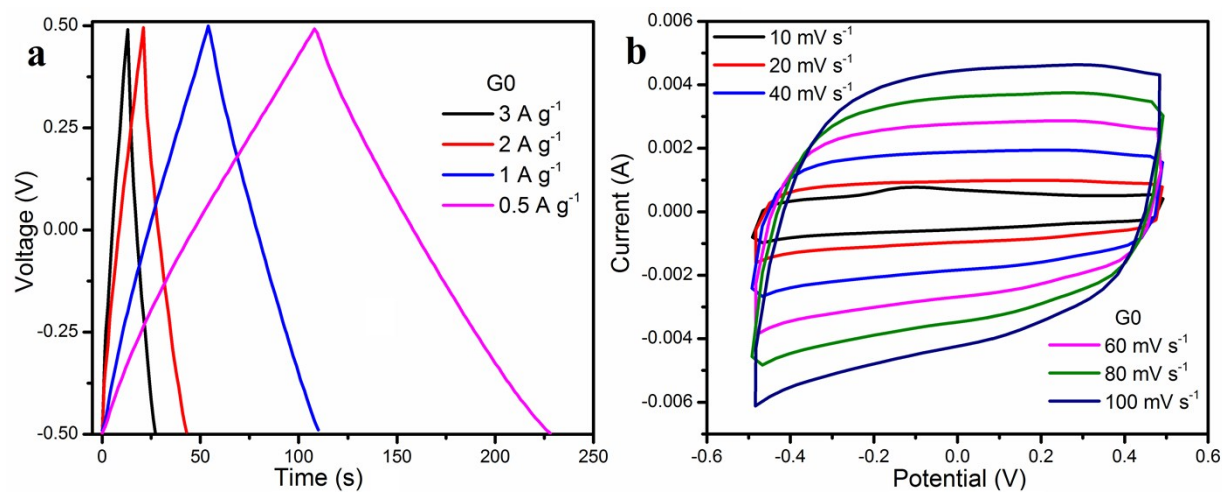

Figure S4 (a) GCD curves of G0 at various current densities and (b) CV curves of G0 at various scan rates.

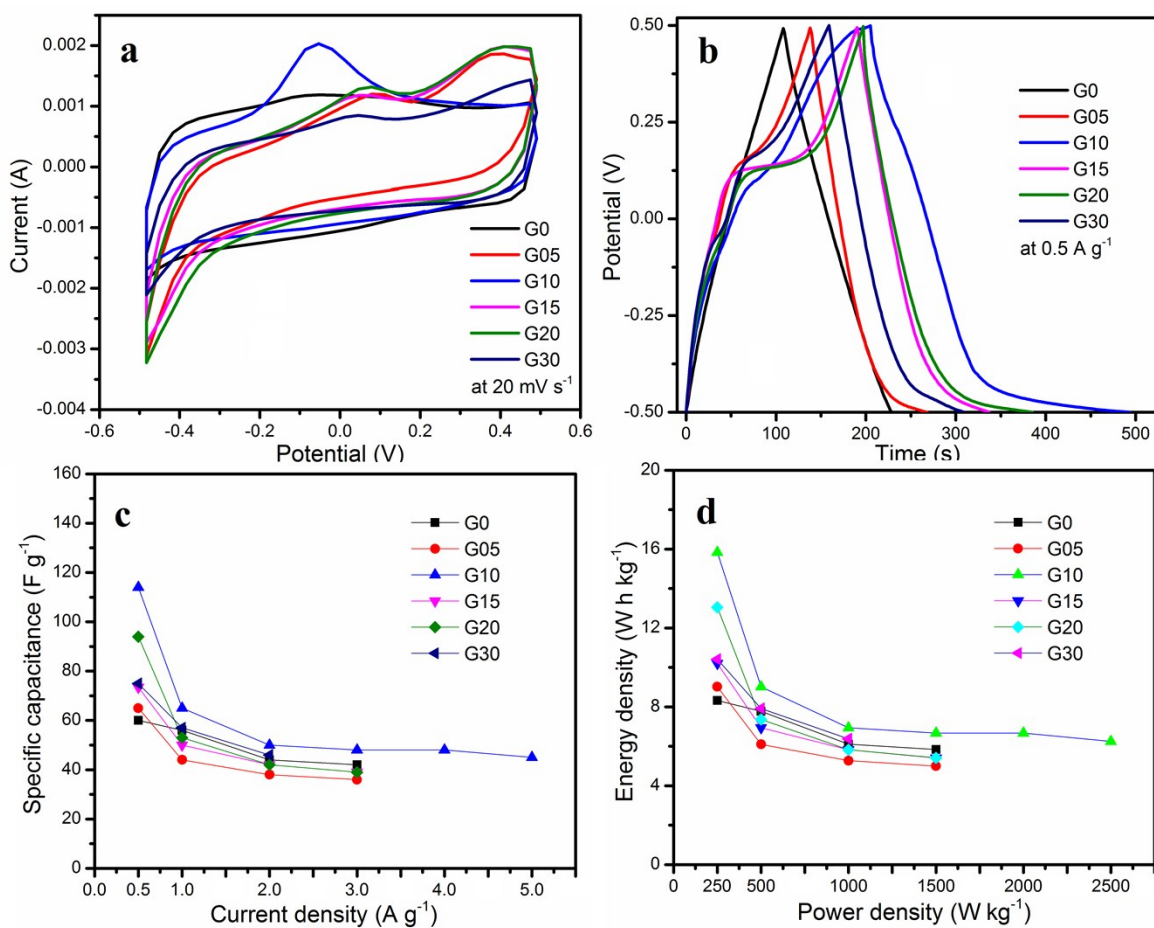

Figure S5 Electrochemical properties of G0, G05, G10, G15, G20 and G30 measured in three electrode system: (a) CV curves, (b) GCD curves, (c) specific capacitance at various current densities, and (d) Ragone plots.

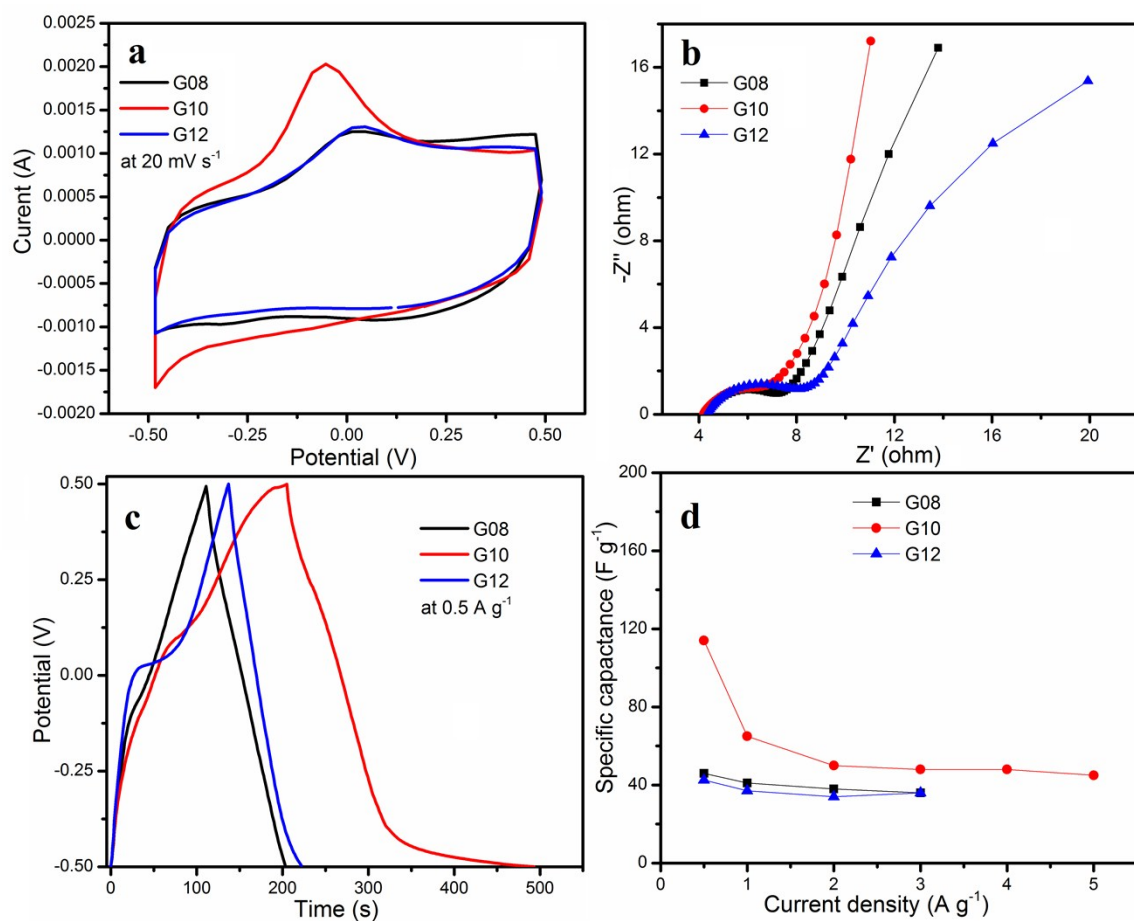

Figure S6 Electrochemical properties of G08, G10 and G12 measured in three electrode system:

(a) CV curves, (b) EIS plots, (c) GCD curves and (d) specific capacitance at various current densities.



Table S1 Coulombic efficiency of graphene composite electrode in G0 gel polymer electrolyte at various current densities

| Current densities (A/g) | Charge time (s) | Discharge time (s) | Coulombic efficiency (%) |
|-------------------------|-----------------|--------------------|--------------------------|
| 3                       | 13              | 13                 | 100                      |
| 2                       | 21              | 21                 | 100                      |
| 1                       | 54              | 56                 | 103.7                    |
| 0.5                     | 108             | 120                | 111.11                   |

Table S2 Coulombic efficiency of graphene composite electrode in G10 gel polymer electrolyte at various current densities

| Current densities (A/g) | Charge time (s) | Discharge time (s) | Coulombic efficiency (%) |
|-------------------------|-----------------|--------------------|--------------------------|
| 5                       | 10              | 10                 | 100                      |
| 4                       | 13              | 12                 | 92.3                     |
| 3                       | 17              | 17                 | 100                      |
| 2                       | 28              | 25                 | 89.3                     |
| 1                       | 70              | 70                 | 100                      |
| 0.5                     | 205             | 288                | 140.5                    |



Table S3 A summary of electrode materials and electrolytes for making supercapacitors

| Electrode materials | Electrolyte                                        | Current density         | Specific capacitance  | Ref.             |
|---------------------|----------------------------------------------------|-------------------------|-----------------------|------------------|
| CNT                 | (PS-PEO-PS)-[EMIM][NTf <sub>2</sub> ] (C-TRI)      | -                       | 20 mF/cm <sup>2</sup> | 13               |
| MWCNT               | Methylene blue                                     | 8.84 mA/cm <sup>2</sup> | 23 F/g                | 20               |
| Activated carbon    | PVA-PVP-H <sub>2</sub> SO <sub>4</sub> -MB         | 1 A/g                   | 328 F/g               | 21               |
| Activated carbon    | m-phenylene-diamine-KOH                            | 0.5 A/g                 | 78.01 F/g             | 22               |
| MWCNT               | Indigo carmine-H <sub>2</sub> SO <sub>4</sub>      | 8.8 mA/cm <sup>2</sup>  | 50 F/g                | 23               |
| Activated carbon    | PVA-H <sub>2</sub> SO <sub>4</sub> -Indigo carmine | 1 A/g                   | 382 F/g               | 27               |
| Activated carbon    | PVA-H <sub>2</sub> SO <sub>4</sub> -alizarin red S | 0.5 A/g                 | 441 F/g               | 31               |
| N-graphene          | PVA-LiClO <sub>4</sub> -phloroglucinol             | 0.5 A/g                 | 114 F/g               | <b>This work</b> |

CNT: Carbon Nanotube

(PS-PEO-PS): Poly(styrene-block-ethylene oxide-block-styrene)

MWCNT: Multi-Walls Carbon Nanotube
